# Supplementary material for: Longitudinal stability of serum neurofilament light chains in psychiatric disorders
Source: Research Square preprint supplement (doi:10.21203/rs.3.rs-7557288/v1), 2025-09-30
Supplement: Supplementary file 1 [file d5365a9b46b9c1a3e54931ec.docx]

**Supplementary Table 1. Diagnostic categories of psychiatric participants.**

| **Main diagnosis at T2** | **n** |
| --- | --- |
| Mood | 285 |
| Psychosis | 264 |
| Anxiety | 141 |
| Personality disorder | 78 |
| Substance abuse | 59 |
| Other | 9 |
| *Total* | 836 |

**Supplementary Table 2. Longitudinal symptom severity in psychiatric participants.**

| **Questionnaire** | **n** | **Total Score** | | | **Difference**  **(Last-T1)** | | **Dependent samples**  **t-test, p value** |
| --- | --- | --- | --- | --- | --- | --- | --- |
| **Timepoint** | **Mean** | **SD** | **Mean** | **SD** |
| PHQ-9 | 380 | T1 | 12.5 | 8.4 | - 5.1 | 8.6 | **<0.001** |
| Last | 7.4 | 7.0 |
| STAI-Y6 | 387 | T1 | 49.4 | 17.7 | -10.8 | 19.2 | **<0.001** |
| Last | 38.6 | 15.5 |
| PSYRATS - Auditory Hallucinations | 23 | T1 | 17.5 | 16.6 | -7.7 | 15.7 | **0.027** |
| Last | 9.7 | 14.6 |
| PSYRATS -Delusions | 26 | T1 | 15.3 | 6.8 | -5.9 | 9.6 | **0.004** |
| Last | 9.3 | 8.8 |

*Note*. PHQ-9: 9-item Patient Health Questionnaire. STAI-Y6: 6-item short form of the Spielberger State-Trait Anxiety Inventory Form Y. PSYRATS: Psychotic Symptom Rating Scales.
